1

## 2 Avoidance response to CO<sub>2</sub> in the lateral horn

3

4 Nélia Varela, Miguel Gaspar, Sophie Dias, Maria Luísa Vasconcelos\*

5 Champalimaud Research, Champalimaud Centre for the Unknown, 1400-038

6 Lisbon, Portugal

7 \*Corresponding author

8

### 9 **ABSTRACT**

10 In flies, the olfactory information is carried from the first relay in the brain, the  
11 antennal lobe, to the mushroom body (MB) and the lateral horn (LH). Olfactory  
12 associations are formed in the MB. The LH was ascribed a role in innate  
13 responses based on the stereotyped connectivity with the antennal lobe,  
14 stereotyped physiological responses to odors and MB silencing experiments.  
15 Direct evidence for the functional role of the LH is still missing. Here we  
16 investigate the behavioral role of the LH neurons directly, using the CO<sub>2</sub>  
17 response as a paradigm. Our results show the involvement of the LH in innate  
18 responses. Specifically, we demonstrate that activity in two sets of neurons is  
19 required for the full behavioral response to CO<sub>2</sub>. Using calcium imaging we  
20 observe that the two sets of neurons respond to CO<sub>2</sub> in different manners. Using  
21 independent manipulation and recording of the two sets of neurons we find that  
22 the one that projects to the SIP also outputs to the local neurons within the LH.  
23 The design of simultaneous output at the LH and the SIP, an output of the MB,  
24 allows for coordination between innate and learned responses.

25

### 26 **INTRODUCTION**

27 Animals use the olfactory system to find partners or food and to avoid predators.  
28 To a certain extent the ability to navigate the olfactory environment is hardwired.  
29 This ability is expanded with life experiences that result in olfactory associations.  
30 The architecture of the olfactory system is comprehensively characterized in the  
31 fruit fly and it is remarkably similar to the mammalian olfactory system (1,2).

32 Olfactory sensory neurons express a single odorant receptor. Olfactory sensory  
33 expressing the same receptor project to the same glomerulus in the first olfactory  
34 center in the brain called antennal lobe in the fly. Most projection neurons  
35 innervate a single glomerulus and carry the information to higher brain centers:  
36 the mushroom body (MB) and the lateral horn (LH) (3,4). The MB is critical for  
37 olfactory associations (5). The LH was ascribed the role of innate response  
38 based on MB silencing experiments (6,7). Projection neurons from the antennal  
39 lobe connect to the MB without apparent spatial selection whereas at the LH  
40 axonal arbors from different glomeruli interdigitate in a stereotyped fashion  
41 (3,4,8–11). The stereotypy is consistent with the proposed role for the LH as the  
42 center for innate olfactory processing. Though the axonal arbors of projection  
43 neurons interdigitate the findings that the arbors of projection neurons that carry  
44 information on pheromone and food odors segregate within the LH and that a  
45 region within the LH is tuned to repulsive odors suggest dedicated processing  
46 areas within the LH (12,13). Lateral horn neurons (LHNs) that respond to the  
47 male pheromone 11-cis-vaccenyl acetate were identified based on the  
48 expression of the male-specific form of the transcription factor fruitless (14,15).  
49 One cluster of male LHNs responds specifically to the pheromone. These results  
50 open the possibility that each odor has a cognate LHN. Indeed, a theoretical  
51 study supports this connectivity (16). However, activity and anatomy of other  
52 LHN clusters suggests a mixed model of connectivity (17). While connectivity at  
53 the LH is being scrutinized, direct evidence for the functional role of the LH is still  
54 missing.

55

56 One of the innate responses with the highest magnitude is the response to CO<sub>2</sub>.  
57 Unlike most insects *Drosophila melanogaster* avoids CO<sub>2</sub> when tested on a T-  
58 maze. The aversive response up to 2% CO<sub>2</sub> is solely mediated by antennal  
59 neurons expressing the CO<sub>2</sub> receptor complex GR21a-GR63a which connect to  
60 the V glomerulus in the antennal lobe (18,19). Synaptic inhibition of GR21a-  
61 GR63a expressing neurons abolishes the avoidance response to low  
62 concentrations of CO<sub>2</sub> (20). Conversely, artificial stimulation of CO<sub>2</sub> sensing

63 neurons with light elicits the avoidance behavior typically observed in response to  
64 CO<sub>2</sub> (21). Not all responses to CO<sub>2</sub> are mediated by GR21a-GR63a neurons.  
65 Higher CO<sub>2</sub> concentrations elicit a response to acid which is processed in a  
66 separate glomerulus (22). Also, a recent study shows that the response to CO<sub>2</sub> is  
67 state-dependent with high activity flies moving towards CO<sub>2</sub> and low activity flies  
68 avoiding CO<sub>2</sub> (23). The attractive response does not require GR21a-GR63a  
69 receptors, instead it is mediated by the ionotropic co-receptor IR25a.

70

71 Here we address directly the behavioral role of the LH neurons using the CO<sub>2</sub>  
72 avoidance to low concentrations to probe the requirement of the LH for innate  
73 responses. We demonstrate that activity in two sets of neurons is required  
74 selectively in the behavioral response to CO<sub>2</sub>.

75

76

## 77 **RESULTS**

78

### 79 **Neurons labeled by lines *R21G11* and *R23C09* process CO<sub>2</sub> avoidance**

80 We chose to investigate the role of LH neurons in the context of the response to  
81 CO<sub>2</sub> due to the high magnitude of the innate response. To identify neurons  
82 involved in CO<sub>2</sub> avoidance we performed an inhibitory screen of fly lines labeling  
83 LH neurons (Figure S1). Through visual inspection of the expression pattern of  
84 Janelia's collection of *GAL4* lines we selected 32 lines with obvious LH  
85 innervation (24,25). To silence the neurons we expressed the inwardly rectifier  
86 potassium channel, *Kir2.1* (26), that hyperpolarizes neurons and thus decreases  
87 the probability of firing an action potential. In the screen and in other behavioral  
88 experiments with *GAL4* lines, we restricted *Kir2.1* expression to adult stage by  
89 using a temperature sensitive *GAL80* (*GAL80<sup>ts</sup>*, see materials and methods) (27).  
90 The 32 lines were tested on a T-maze where flies were allowed to choose  
91 between air and 0.5% CO<sub>2</sub> (Figure S1A). Eight lines showed a significant  
92 reduction in avoidance (multiple t-test corrected with Holm-Sidak method,  
93 p<0.05,) and when retested, three of them exhibited a consistent reduction in

94 avoidance to CO<sub>2</sub> (Figure S1B). Line *R65D12* was discarded due to innervation  
95 in the V-glomerulus (data not shown). Neurons in lines *R21G11* and *R23C09*  
96 (which we will henceforth call *21G11* and *23C09* neurons) are necessary for the  
97 behavioral response to CO<sub>2</sub> (Figure 1A, here tested to 1% CO<sub>2</sub>). Since the  
98 requirement of the V-glomerulus bilateral projection neurons and the MB for CO<sub>2</sub>  
99 avoidance is feeding state dependent (10), we tested if feeding state also affects  
100 the contribution of *21G11* and *23C09* neurons in the avoidance response of the  
101 fly. We observe that starvation does not alter the phenotype, indicating that the  
102 involvement of *21G11* and *23C09* neurons in CO<sub>2</sub> response is independent of the  
103 feeding state of the fly (Figure S2A).

104

105 Given that CO<sub>2</sub> avoidance is reduced but not abolished for either line we tested  
106 flies with both sets of neurons silenced (Figure S2B). We observe no change in  
107 the phenotype indicating that the two sets of neurons do not complement each  
108 other, i.e., the activity of these populations may not be independent to drive  
109 avoidance responses (Post-hoc two-way ANOVA comparing individual and  
110 combined expressions not significant both for control and test samples). It has  
111 been previously shown that different projection neurons of the V-glomerulus are  
112 required for the behavioral response to different CO<sub>2</sub> concentrations (9).  
113 Therefore we tested whether the requirement of *21G11* and *23C09* neurons for  
114 avoidance to CO<sub>2</sub> was concentration dependent. For this experiment, we used  
115 lines *21G11-LexA* and *23C09 ∩ VGlut* that have a restricted expression when  
116 compared to *R21G11* and *R23C09* lines (Figure 1D and E, see below). We  
117 observe that silencing the activity of these neurons reduces the avoidance  
118 behavior of the flies in a comparable manner across odor concentrations (Post-  
119 hoc two-way ANOVA comparing across odor concentrations not significant both  
120 for control and test samples). These results suggest that *21G11* and *23C09*  
121 neurons contribute to CO<sub>2</sub> avoidance independently of concentration (within the  
122 range that does not engage the acid sensing response).

123

124 Anatomical inspection reveals that line 21G11 labels one cluster of neurons that  
125 innervate the dorsoposterior area of the LH and project to the superior  
126 intermediate protocerebrum (SIP) (Figure 1D). Some morphological and  
127 physiological types of LH output neurons have been described previously (17,28).  
128 The *21G11* cluster with its posterior cell bodies and projections to the SIP does  
129 not appear to correspond to the described morphological categories.

130 We generated a *LexA* version of the line to allow independent manipulation of the  
131 21G11 and 23C09 clusters of neurons. The *LexA* version of 21G11 is very  
132 sparse. Additionally, the number of neurons labeled in the LH cluster is smaller.  
133 We counted 10 cell bodies in the *LexA* version and 16 to 18 cell bodies in the  
134 *GAL4* version (n=5). When we overlaid the expression of both lines we found that  
135 7 to 9 cells were specific to *21G11-GAL4*, three cells specific to *21G11-LexA* and  
136 seven cells are common to both lines (Figure S3, n=9). Nevertheless, activity in  
137 *21G11-LexA* neurons is necessary to elicit full CO<sub>2</sub> avoidance (see Figure 1C).  
138 Line *23C09* labels more than one cluster of neurons at the LH (Figure 1E). To  
139 narrow down the expression of line *23C09*, we generated a *splitGAL4* version  
140 and then we intersected the expression with that of different neurotransmitter-  
141 *splitGAL4* lines (29,30). We found that a glutamatergic cluster located posteriorly  
142 is involved in the response (Figure 1C and E). This cluster, which we will call  
143 *23C09 ∩ VGlut*, has 8 to 10 cell bodies (n=3) with processes only within the LH.  
144 For expression of these lines in 10 μm sections across the brain see Figure S4.  
145 In order to determine the polarity of *21G11* neurons we used the neural  
146 compartment markers Dscam17.1-GFP(31), for dendrites and Synaptotagmin-HA  
147 (32) for presynaptic areas. Dscam17.1-GFP signal localized exclusively to the LH,  
148 which indicates that these neurons receive inputs there, presumably olfactory.  
149 The synaptotagmin-HA signal, on the other hand, is localized both to the LH and  
150 the SIP. To exclude the possibility that the *GAL4* cluster holds a mix population  
151 of neurons with different polarities we marked the more restricted *21G11-LexA*  
152 neurons and observed the same distribution of Synaptotagmin-HA (Figure S5).  
153 These results suggest that *21G11* neurons output both in the SIP and the LH.  
154 Finally, we asked if *21G11* or *23C09* contact projections from the V-glomerulus.

155 Three distinct projection neurons from the V glomerulus (VPN) at the antennal  
156 lobe innervate the medial border of the LH (9,10). We tested two VPNs for which  
157 there are lines available with a strong visible projection. We do not see clear  
158 overlap at the LH between the innervation of the VPNs and the innervation of the  
159 LH neurons we identified (Figure 1H and I). This observation together with the  
160 fact that the reduction in avoidance is not complete indicates that additional LH  
161 neurons are involved in the response.

162

### 163 ***21G11* and *23C09* $\cap$ *VGlut* neurons respond to CO<sub>2</sub> in different** 164 **concentration dependent manners**

165 Having demonstrated that *21G11* and *23C09* neurons are required for the  
166 behavioral response to CO<sub>2</sub>, we next addressed the physiological response of  
167 these neurons. We measured the changes in internal free calcium levels in  
168 *21G11* and *23C09*  $\cap$  *VGlut* neurons upon stimulation with CO<sub>2</sub>. For this we  
169 expressed the genetically encoded calcium indicator *GCaMP6m* (33) in *21G11*  
170 and *23C09*  $\cap$  *VGlut* neurons and recorded the calcium dynamics in a live fly  
171 preparation at the two-photon microscope. The neurons labeled by *R21G11*  
172 respond to all concentrations of CO<sub>2</sub> with the peak  $\Delta F/F$  increasing from 0.5 to  
173 1% CO<sub>2</sub> (Figure 2A-B, Wilcoxon signed-rank test  $w=66.00$ ,  $p=0.0011$ ). The peak  
174 response to 1% and 2% are not significantly different though the length of the  
175 response appears to be larger at 2% (Wilcoxon signed-rank test  $w=38.00$ ,  
176  $p=0.0727$ ). We also tested responses to CO<sub>2</sub> in the subset of *21G11* neurons  
177 labeled by *21G11-LexA* (Figure 2C-D). To our surprise this subset responds only  
178 to 0.5% CO<sub>2</sub> (Wilcoxon signed-rank test  $w=15.00$ ,  $p<0.0001$ ). This observation  
179 suggests that within the *21G11* cluster different neurons are sensitive to different  
180 concentrations of CO<sub>2</sub>. However, in Figure 1C we observed that when these  
181 same neurons are silenced, the behavioral response to different CO<sub>2</sub>  
182 concentrations does not change. Based on these findings we speculate that as  
183 soon as the activity of the neurons responsive to the lowest concentration is  
184 compromised the behavioral output to all concentrations is affected. Recordings  
185 of *23C09*  $\cap$  *VGlut* neurons show they respond all CO<sub>2</sub> concentrations tested.

186 Though the curve of the response appears larger for lower concentrations there  
187 is no significant difference between peak amplitudes of  $\Delta F/F$  of different  
188 concentrations (Figure 2E-F). In summary, both clusters respond to CO<sub>2</sub>  
189 stimulation at different concentrations, with each set of neurons exhibiting a  
190 different pattern of free calcium response to CO<sub>2</sub> stimulation.

191

### 192 **Physiological response of *23C09* $\cap$ *VGlut* depends on output of *21G11-LexA***

193 The two sets of neurons that we identified innervate a similar region of the LH  
194 and contribute to the same behavioral response. When we silenced both clusters  
195 simultaneously we saw no additive effect, indicating they are not independent  
196 from each other to drive avoidance (Figure S2B). We therefore asked whether  
197 the two clusters are connected. To this end we used GRASP (GFP reconstitution  
198 across synaptic partners) that reveals membrane contact between two sets of  
199 neurons (34). We observe a strong signal in the LH indicating that the  
200 membranes of the two clusters contact each other (Figure 3A). To assess  
201 functional connectivity we manipulated the activity of one cluster while imaging  
202 activity on the second cluster. We silenced *21G11-LexA* neurons with the  
203 expression of *Kir2.1* using the *LexA/LexAOp* expression system and imaged  
204 *23C09*  $\cap$  *VGlut* neurons expressing *GCaMP6.0m* with the *GAL4/UAS* system  
205 (Schematic in Figure 3B). To control for silencing we co-expressed *Kir2.1* and  
206 *GCaMP6.0m* in *21G11-LexA* neurons and confirmed that no calcium signal is  
207 observed with CO<sub>2</sub> stimulation (Figure S6). Upon presentation of CO<sub>2</sub> at the  
208 concentrations 0.5, 1 and 2%, we observed a very consistent response across  
209 trials and across concentrations in *23C09*  $\cap$  *VGlut* neurons when *21G11-LexA*  
210 neurons are silenced (Figure 3B and C, Mann-Whitney, not significant). When we  
211 compared the peak responses of *23C09*  $\cap$  *VGlut* while *21G11-LexA* is intact  
212 (Figure 2F) or silenced (Figure 3C), we found that there is pronounced reduction  
213 for 0.5% CO<sub>2</sub> responses which corresponds to the profile of *21G11-LexA*  
214 responses (Figure 3D). The results indicate that the output of *21G11-LexA*  
215 neurons contributes to *23C09*  $\cap$  *VGlut* activity. To test this directly, we expressed

216 the red-shifted channelrhodopsin *Chrimson* (35) in *21G11-LexA* neurons to allow  
217 activation of *21G11-LexA* neurons with 720nm light while recording *23C09*  $\cap$   
218 *VGlut* calcium concentration with *GCaMP6.0m*. We observe that indeed  
219 activation of *21G11-LexA* neurons with light generates a strong calcium response  
220 in *23C09*  $\cap$  *VGlut* neurons (Figure 3E and F). No calcium response was observed  
221 in *23C09*  $\cap$  *VGlut* neurons when flies were not fed retinal, which is necessary for  
222 *Chrimson* function (Figure 3E and F).

223

224 We next did the converse experiments where we manipulate activity in *23C09*  $\cap$   
225 *VGlut* neurons and image activity in *21G11-LexA* neurons using the same tools  
226 with the expression systems reversed. Silencing *23C09*  $\cap$  *VGlut* neurons does  
227 not change *21G11-LexA* response to CO<sub>2</sub> presentation (Figure 3F and G). These  
228 results indicate that *23C09*  $\cap$  *VGlut* neurons do not output into *21G11-LexA*  
229 neurons. We then performed optogenetic activation of *23C09*  $\cap$  *VGlut* neurons  
230 and recorded the calcium response of *21G11-LexA* neurons. We did not observe  
231 a calcium response in *21G11-LexA* neurons upon light stimulation of *23C09*  $\cap$   
232 *VGlut* neurons (Figure 3H). To control for activation of *23C09*  $\cap$  *VGlut* neurons we  
233 expressed both *Chrimson* and *GCaMP6m* in these neurons and could see a  
234 response with light stimulation (Figure S7). The activation results further support  
235 the notion that *23C09*  $\cap$  *VGlut* does not output into *21G11-LexA* neurons.

236

237 Taken together the results indicate that *21G11-LexA* neurons are presynaptic to  
238 *23C09*  $\cap$  *VGlut* neurons. The presence of a presynaptic marker at the LH  
239 processes of *21G11-LexA* neurons is consistent with these observations (Figure  
240 1F). Based on our findings we propose a model where CO<sub>2</sub> response is  
241 processed at the SIP via *21G11* output (Figure 3I). *21G11* also outputs at the LH  
242 to activate the *23C09*  $\cap$  *VGlut* local neurons that are glutamatergic. Given that it  
243 has been proposed that glutamatergic neurons in the fly brain are inhibitory (36),  
244 we speculate that *23C09* neurons inhibit output neurons that mediate attraction.

245



246 **21G11 and 23C09  $\cap$  VGlut neurons are selectively involved in processing**  
247 **CO<sub>2</sub> avoidance**

248 We then asked if the circuit we identified at the LH is involved in the response to  
249 other odors. It could be central to all odor responses or perhaps be involved only  
250 in the aversive responses or even selectively involved in the CO<sub>2</sub> response. To  
251 answer this question we first measured the calcium responses to different odors  
252 (Figure 4 A-D). To test attractive odor responses we used farnesol, an attractant  
253 present in the rind of ripe citrus and processed through a single glomerulus (37),  
254 and apple cider vinegar, a complex attractive stimulus (38). While apple cider  
255 vinegar elicits a small response in both sets of neurons, farnesol does not elicit a  
256 response in either set of neurons (Figure 4A-D). To test aversive responses we  
257 used benzaldehyde that smells of bitter almond and acetic acid that elicits the  
258 acid sensing response in the antennal lobe (22). 21G11 neurons respond to both  
259 acetic acid and benzaldehyde (Figure 4A and B). 23C09 neurons respond only to  
260 benzaldehyde in an atypical fashion (Figure 4C-D). The rise in calcium  
261 concentration happens a few seconds after stimulus presentation. Though the  
262 peak  $\Delta F/F$  in all these responses is low, the physiological response is broad and  
263 includes responses to aversive and attractive odors. How do these physiological  
264 responses translate into a behavioral response? To address this question we  
265 tested the requirement of activity in 23C09  $\cap$  VGlut or 21G11-GAL4 (broader  
266 expression than 21G11-LexA) neurons for the behavioral response to other  
267 odors. Similarly to what we did in the screen, we tested the flies using a T-maze.  
268 Also following the screen conditions, we silenced the neurons with *Kir2.1* only in  
269 the adult stage. We allowed the flies to choose between air and either farnesol,  
270 apple cider vinegar, acetic acid or benzaldehyde at 1/1000 dilution. It was  
271 reported that there is a non-olfactory component to benzaldehyde avoidance at  
272 1/100 dilution. We confirmed that we are not including a non-olfactory component  
273 in our experiment by testing the response of flies without olfactory organs to our  
274 working dilution of benzaldehyde (Figure S8). We observe that activity in 23C09  
275  $\cap$  VGlut or 21G11-GAL4 neurons is not required either for attraction to farnesol  
276 or apple cider vinegar indicating that activity in these LH neurons is not involved

277 in general odor responses (Figure 4E). Silencing *23C09*  $\cap$  *VGlut* or *21G11-GAL4*  
278 neurons also does not affect avoidance to benzaldehyde and acetic acid (Figure  
279 4F). Interestingly, though the arborization at the LH of the acid sensing projection  
280 neurons is very similar to the arborization of the V-glomerulus projection neurons  
281 (39), it appears that different LH neurons process these responses. The results  
282 indicate that activity in *21G11* and *23C09*  $\cap$  *VGlut* neurons is selectively required  
283 for the response to CO<sub>2</sub>.

284

285

## 286 **DISCUSSION**

287 In this study we used a behavioral readout to directly address the role of the LH  
288 in olfactory responses. We showed that the activity of two clusters of LH neurons  
289 is required for *D. melanogaster* innate avoidance of CO<sub>2</sub>. Furthermore, because  
290 we have not found a correlation between the activity of these LH neurons and the  
291 behavioral responses to other general odors, we conclude that the activity of  
292 *21G11* and *23C09*  $\cap$  *VGlut* neurons is specifically required for responses to CO<sub>2</sub>.  
293 Thus, our results unravel a circuit within the LH region specific for CO<sub>2</sub> avoidance  
294 responses in the lower concentration range. However, the avoidance to CO<sub>2</sub> is  
295 not completely abolished by silencing these neurons. This could have three  
296 origins: not all cells are labeled in the identified cluster; unidentified clusters are  
297 involved; the LH has intricate connectivity and silencing of any LH neuron leads  
298 to disruption of the behavior. The latter is unlikely as we silenced and tested 32  
299 lines labeling different LH neurons, some of them innervating very large sections  
300 of the LH and only the two lines described here consistently had an effect.  
301 Though we cannot eliminate any of the former possibilities, the lack of contact  
302 between the LH neurons we identified and the V-glomerulus projection neurons  
303 that carry CO<sub>2</sub> stimulus information argues for the involvement of additional  
304 neurons.

305

306 Recent work indicates that MB can be involved in innate aversion and the LH is  
307 required for the execution of learned aversion (10,40–42). Hence, the roles of the

308 two centers are not as segregated as previously thought and they must be  
309 connected to coordinate the innate and the learned responses. The *21G11*  
310 output neurons we identified connect to the superior intermediate protocerebrum.  
311 It is an area highly innervated by MB output neuron terminals (MBONs)  
312 suggesting a location for integration of LH and MB output (43,44). At the other  
313 extremity of *21G11* neurons, we showed that they output within the LH to the  
314 *23C09*  $\cap$  *VGlut* neurons. Since these are glutamatergic neurons and  
315 glutamatergic signaling in the brain can be inhibitory we speculate that activation  
316 of *21G11* and *23C09*  $\cap$  *VGlut* leads to inhibition of LH output neurons that  
317 mediate attraction.

318

319 A vast search has identified compounds that either increase or decrease the  
320 activity of the CO<sub>2</sub> receptors (45). It was revealed that odors increasing receptor  
321 activity generate avoidance responses and odors decreasing receptor activity  
322 generate attraction responses indicating that the CO<sub>2</sub> receptor pathway has a  
323 strong weight in establishing odor valence (46). Further work should elucidate  
324 how the LH neurons identified here contribute to these responses.

325

326 In summary, we demonstrated a role of the LH in an innate behavioral response.  
327 The neurons we identified appear to be involved in suppression of attraction at  
328 the LH. Moving forward, it will be interesting to explore whether a similar  
329 organization at the LH is used to generate responses to other odors and how the  
330 response is coordinated with the MB.

331

## 332 **ACKNOWLEDGEMENTS**

333 We thank Eugenia Chiappe, Susana Lima, Marta Moita and members of the  
334 Vasconcelos Laboratory for discussion and comments on the manuscript. Barry  
335 Dickson provided fly stock and Gerald M. Rubin provided a promoter plasmid.  
336 We would like to thank the Fly and Molecular platforms of Champalimaud Centre  
337 for the Unknown (CCU) for generating the transgenic flies and scientific hardware  
338 and software platforms of CCU for support with the optogenetic activation

339 experiments. This work was supported by Fundação Champalimaud, a grant  
340 from Fundação para Ciência e tecnologia (FCT) PTDC/BIA-BCM/104898/2008,  
341 FCT fellowship SFRH/BDP/77360/2011 to N.V.

342

### 343 **AUTHOR CONTRIBUTION**

344 N.V. and M.L.V. conceived and designed the project. M.G. performed the  
345 behavioral screen. N.V. performed all other experiments with the technical  
346 assistance of S.D. M.L.V. provided guidance and wrote the paper with N.V.

347

### 348 **DECLARATION OF INTEREST**

349 The authors declare no competing interests.

350

351

### 352 **REFERENCES**

- 353 1. Vosshall LB, Stocker RF. Molecular architecture of smell and taste in  
354 *Drosophila*. *Annu Rev Neurosci* [Internet]. 2007 Jan [cited 2011 Jul  
355 18];30:505–33. Available from:  
356 <http://www.ncbi.nlm.nih.gov/pubmed/17506643>
- 357 2. Masse NY, Turner GC, Jefferis GSXE. Olfactory Information Processing in  
358 *Drosophila*. *Curr Biol* [Internet]. Elsevier Ltd; 2009;19(16):R700–13.  
359 Available from: <http://dx.doi.org/10.1016/j.cub.2009.06.026>
- 360 3. Wong AM, Wang JW, Axel R. Spatial representation of the glomerular map  
361 in the *Drosophila* protocerebrum. *Cell* [Internet]. 2002 Apr 19;109(2):229–  
362 41. Available from: <http://www.ncbi.nlm.nih.gov/pubmed/12007409>
- 363 4. Marin EC, Jefferis GSXE, Komiyama T, Zhu H, Luo L. Representation of  
364 the glomerular olfactory map in the *Drosophila* brain. *Cell*. 2002;109:243–  
365 55.
- 366 5. Keene AC, Waddell S. *Drosophila* olfactory memory: single genes to  
367 complex neural circuits. *Nat Rev Neurosci* [Internet]. 2007;8(5):341–54.  
368 Available from: <http://www.nature.com/doi/10.1038/nrn2098>
- 369 6. Heimbeck G, Bugnon V, Gendre N, Keller A, Stocker RF. A central neural

- 370 circuit for experience-independent olfactory and courtship behavior in  
371 *Drosophila melanogaster*. *Proc Natl Acad Sci U S A*. 2001;98:15336–41.
- 372 7. Parnas M, Lin AC, Huetteroth W, Miesenbo G, Miesenb??ck G. Odor  
373 Discrimination in *Drosophila*: From Neural Population Codes to Behavior.  
374 *Neuron*. 2013;79(5):932–44.
- 375 8. Datta SR, Vasconcelos ML, Ruta V, Luo S, Wong A, Demir E, et al. The  
376 *Drosophila* pheromone cVA activates a sexually dimorphic neural circuit.  
377 *Nature* [Internet]. 2008 Mar;452(7186):473–7. Available from:  
378 <http://www.ncbi.nlm.nih.gov/pubmed/18305480>
- 379 9. Lin H-H, Chu L-A, Fu T-F, Dickson BJ, Chiang A-S. Parallel neural  
380 pathways mediate CO<sub>2</sub> avoidance responses in *Drosophila*. *Science*  
381 [Internet]. 2013 Jun 14 [cited 2014 Mar 25];340(6138):1338–41. Available  
382 from: <http://www.ncbi.nlm.nih.gov/pubmed/23766327>
- 383 10. Bräcker LB, Siju KP, Varela N, Aso Y, Zhang M, Hein I, et al. Essential role  
384 of the mushroom body in context-dependent CO<sub>2</sub> avoidance in *Drosophila*.  
385 *Curr Biol* [Internet]. 2013 Jul 8 [cited 2014 Mar 26];23(13):1228–34.  
386 Available from: <http://www.ncbi.nlm.nih.gov/pubmed/23770186>
- 387 11. Caron SJC, Ruta V, Abbott LF, Axel R. Random convergence of olfactory  
388 inputs in the *Drosophila* mushroom body. *Nature* [Internet]. Nature  
389 Publishing Group; 2013 May 2 [cited 2014 Jul 20];497(7447):113–7.  
390 Available from: <http://www.ncbi.nlm.nih.gov/pubmed/23615618>
- 391 12. Jefferis GSXE, Potter CJ, Chan AM, Marin EC, Rohlfig T, Maurer CR, et  
392 al. Comprehensive Maps of *Drosophila* Higher Olfactory Centers: Spatially  
393 Segregated Fruit and Pheromone Representation. *Cell*. 2007;128:1187–  
394 203.
- 395 13. Strutz A, Soelter J, Baschwitz A, Farhan A, Grabe V, Rybak J, et al.  
396 Decoding odor quality and intensity in the *Drosophila* brain. *Elife*.  
397 2014;3:e04147.
- 398 14. Ruta V, Datta SR, Vasconcelos ML, Freeland J, Looger LL, Axel R. A  
399 dimorphic pheromone circuit in *Drosophila* from sensory input to  
400 descending output. *Nature* [Internet]. Nature Publishing Group; 2010 Dec 2

- 401 [cited 2011 Jun 15];468(7324):686–90. Available from:  
402 <http://www.ncbi.nlm.nih.gov/pubmed/21124455>
- 403 15. Kohl J, Ostrovsky AD, Frechter S, Jefferis GSXE. A bidirectional circuit  
404 switch reroutes pheromone signals in male and female brains. *Cell*  
405 [Internet]. The Authors; 2013 Dec 19 [cited 2014 Mar 26];155(7):1610–23.  
406 Available from:  
407 <http://www.pubmedcentral.nih.gov/articlerender.fcgi?artid=3898676&tool=pmcentrez&rendertype=abstract>
- 409 16. Luo SX, Axel R, Abbott LF. Generating sparse and selective third-order  
410 responses in the olfactory system of the fly. *Proc Natl Acad Sci U S A*  
411 [Internet]. 2010 Jun 8 [cited 2014 Oct 3];107(23):10713–8. Available from:  
412 <http://www.pubmedcentral.nih.gov/articlerender.fcgi?artid=2890779&tool=pmcentrez&rendertype=abstract>
- 414 17. Fişek M, Wilson RI. Stereotyped connectivity and computations in higher-  
415 order olfactory neurons. *Nat Neurosci* [Internet]. 2014 Feb [cited 2014 Mar  
416 22];17(2):280–8. Available from:  
417 <http://www.ncbi.nlm.nih.gov/pubmed/24362761>
- 418 18. Kwon JY, Dahanukar A, Weiss LA, Carlson JR. The molecular basis of  
419 CO<sub>2</sub> reception in *Drosophila*. *Proc Natl Acad Sci U S A* [Internet]. 2007  
420 Feb 27;104(9):3574–8. Available from:  
421 <http://www.ncbi.nlm.nih.gov/pubmed/17360684>
- 422 19. Jones WD, Cayirlioglu P, Kadow IG, Vosshall LB. Two chemosensory  
423 receptors together mediate carbon dioxide detection in *Drosophila*. *Nature*  
424 [Internet]. 2007 Jan;445(7123):86–90. Available from:  
425 <http://www.ncbi.nlm.nih.gov/pubmed/17167414>
- 426 20. Suh GSB, Wong AM, Hergarden AC, Wang JW, Simon AF, Benzer S, et al.  
427 A single population of olfactory sensory neurons mediates an innate  
428 avoidance behaviour. *Dros Nat*. 2004;431:854–9.
- 429 21. Suh GSB, Ben-Tabou de Leon S, Tanimoto H, Fiala A, Benzer S,  
430 Anderson DJ. Light activation of an innate olfactory avoidance response in  
431 *Drosophila*. *Curr Biol* [Internet]. 2007 May 15 [cited 2014 Mar

- 432 20];17(10):905–8. Available from:  
433 <http://www.ncbi.nlm.nih.gov/pubmed/17493811>
- 434 22. Ai M, Min S, Grosjean Y, Leblanc C, Bell R, Benton R, et al. Acid sensing  
435 by the *Drosophila* olfactory system. *Nature* [Internet]. 2010 Dec 2 [cited  
436 2014 Jul 24];468(7324):691–5. Available from:  
437 <http://www.pubmedcentral.nih.gov/articlerender.fcgi?artid=3105465&tool=pmcentrez&rendertype=abstract>
- 439 23. Breugel F Van, Huda A, Dickinson MH. *Drosophila* have distinct activity-  
440 gated pathways that mediate attraction and aversion to CO<sub>2</sub>. 2017;1–8.
- 441 24. Pfeiffer BD, Jenett A, Hammonds AS, Ngo T-TB, Misra S, Murphy C, et al.  
442 Tools for neuroanatomy and neurogenetics in *Drosophila*. *Proc Natl Acad Sci U S A* [Internet]. 2008 Jul;105(28):9715–20. Available from:  
443 <http://www.pubmedcentral.nih.gov/articlerender.fcgi?artid=2447866&tool=pmcentrez&rendertype=abstract>
- 444 25. Jenett A, Rubin GM, Ngo T-TTB, Shepherd D, Murphy C, Dionne H, et al.  
445 A GAL4-driver line resource for *Drosophila* neurobiology. *Cell Rep*  
446 [Internet]. The Authors; 2012 Oct 25 [cited 2014 Jul 15];2(4):991–1001.  
447 Available from:  
448 <http://www.pubmedcentral.nih.gov/articlerender.fcgi?artid=3515021&tool=pmcentrez&rendertype=abstract>
- 449 26. Baines RA, Uhler JP, Thompson A, Sweeney ST, Bate M. Altered  
450 Electrical Properties in *Drosophila* neurons developing without synaptic  
451 transmission. *J Neurosci* [Internet]. 2001 Mar 1 [cited 2014 Oct  
452 16];21(5):1523–31. Available from:  
453 <http://www.jneurosci.org/content/21/5/1523.short>
- 454 27. McGuire SE, Mao Z, Davis RL. Spatiotemporal gene expression targeting  
455 with the TARGET and gene-switch systems in *Drosophila*. *Sci STKE*  
456 [Internet]. 2004 Feb 17 [cited 2014 Mar 21];2004(220):pl6. Available from:  
457 <http://www.ncbi.nlm.nih.gov/pubmed/14970377>
- 458 28. Tanaka NK, Awasaki T, Shimada T, Ito K. Integration of chemosensory  
459 pathways in the *Drosophila* second-order olfactory centers. *Curr Biol*  
460  
461  
462

- 463 [Internet]. 2004 Mar 23;14(6):449–57. Available from:  
464 <http://www.ncbi.nlm.nih.gov/pubmed/15043809>
- 465 29. Luan H, Peabody NCN, Vinson CRC, White BBH. Refined spatial  
466 manipulation of neuronal function by combinatorial restriction of transgene  
467 expression. *Neuron* [Internet]. 2006 [cited 2014 Oct 17];52(3):425–36.  
468 Available from:  
469 <http://www.sciencedirect.com/science/article/pii/S089662730600674X>
- 470 30. Diao FF, Ironfield H, Luan H, Diao FF, Shropshire WC, Ewer J, et al. Plug-  
471 and-Play Genetic Access to *Drosophila* Cell Types using Exchangeable  
472 Exon Cassettes. *Cell Rep* [Internet]. The Authors; 2015;10(8):1410–21.  
473 Available from:  
474 <http://www.sciencedirect.com/science/article/pii/S2211124715001011>
- 475 31. Wang J, Ma X, Yang JS, Zheng X, Zugates CT, Lee CHJ, et al.  
476 Transmembrane/juxtamembrane domain-dependent Dscam distribution  
477 and function during mushroom body neuronal morphogenesis. *Neuron*.  
478 2004;43(5):663–72.
- 479 32. Robinson IM, Ranjan R, Schwarz TL. Synaptotagmins I and IV promote  
480 transmitter release independently of Ca(2+) binding in the C(2)A domain.  
481 *Nature* [Internet]. 2002 Jul 18;418(6895):336–40. Available from:  
482 <http://www.ncbi.nlm.nih.gov/pubmed/12110845>
- 483 33. Chen T-W, Wardill TJ, Sun Y, Pulver SR, Renninger SL, Baohan A, et al.  
484 Ultrasensitive fluorescent proteins for imaging neuronal activity. *Nature*  
485 [Internet]. 2013 Jul 18 [cited 2014 Mar 19];499(7458):295–300. Available  
486 from:  
487 <http://www.pubmedcentral.nih.gov/articlerender.fcgi?artid=3777791&tool=pmcentrez&rendertype=abstract>
- 488
- 489 34. Gordon MD, Scott K. Motor control in a *Drosophila* taste circuit. *Neuron*  
490 [Internet]. Elsevier Ltd; 2009 Feb;61(3):373–84. Available from:  
491 <http://www.pubmedcentral.nih.gov/articlerender.fcgi?artid=2650400&tool=pmcentrez&rendertype=abstract>
- 492
- 493 35. Klapoetke NC, Murata Y, Kim SS, Pulver SR, Birdsey-Benson A, Cho YK,



- 494 et al. Independent optical excitation of distinct neural populations. Nat  
495 Methods [Internet]. Nature Publishing Group; 2014 Mar [cited 2014 Apr  
496 28];11(3):338–46. Available from:  
497 <http://www.ncbi.nlm.nih.gov/pubmed/24509633>
- 498 36. Liu WW, Wilson RI. Glutamate is an inhibitory neurotransmitter in the  
499 *Drosophila* olfactory system. 2013;2013.
- 500 37. Ronderos DS, Lin C, Potter CJ, Smith DP. Farnesol-Detecting Olfactory  
501 Neurons in *Drosophila*. 2014;34(11):3959–68.
- 502 38. Semmelhack JL, Wang JW. Select *Drosophila* glomeruli mediate innate  
503 olfactory attraction and aversion. Nature [Internet]. 2009 May 14 [cited  
504 2014 Jul 30];459(7244):218–23. Available from:  
505 <http://www.pubmedcentral.nih.gov/articlerender.fcgi?artid=2702439&tool=pmcentrez&rendertype=abstract>  
506
- 507 39. Min S, Ai M, Shin S a, Suh GSB. Dedicated olfactory neurons mediating  
508 attraction behavior to ammonia and amines in *Drosophila*. Proc Natl Acad  
509 Sci U S A [Internet]. 2013 Apr 2 [cited 2014 Sep 10];110(14):E1321-9.  
510 Available from:  
511 <http://www.pubmedcentral.nih.gov/articlerender.fcgi?artid=3619346&tool=pmcentrez&rendertype=abstract>  
512
- 513 40. Lewis LPC, Siju KP, Aso Y, Friedrich AB, Bulteel AJB, Rubin GM, et al. A  
514 Higher Brain Circuit for Immediate Integration of Conflicting Sensory  
515 Information in *Drosophila*. Curr Biol [Internet]. Elsevier Ltd; 2015 Aug  
516 31;25(17):2203–14. Available from:  
517 <http://dx.doi.org/10.1016/j.cub.2015.07.015>
- 518 41. Dolan M, Belliard-Guérin G, Bates AS, Aso Y, Frechter S, Roberts RJV, et  
519 al. Communication from learned to innate olfactory processing  
520 centers is required for memory retrieval in *Drosophila*. bioRxiv.  
521 2017;
- 522 42. Séjourné J, Plaçais P-Y, Aso Y, Siwanowicz I, Trannoy S, Thoma V, et al.  
523 Mushroom body efferent neurons responsible for aversive olfactory  
524 memory retrieval in *Drosophila*. Nat Neurosci [Internet]. Nature Publishing

- 525 Group; 2011 Jul [cited 2014 Mar 19];14(7):903–10. Available from:  
526 <http://www.ncbi.nlm.nih.gov/pubmed/21685917>
- 527 43. Aso Y, Sitaraman D, Ichinose T, Kaun KR, Vogt K, Belliart-Guérin G, et al.  
528 Mushroom body output neurons encode valence and guide memory-based  
529 action selection in *Drosophila*. *Elife* [Internet]. 2014;3(3):1–42.  
530 Available from: <http://elifesciences.org/lookup/doi/10.7554/eLife.04580>
- 531 44. Aso Y, Hattori D, Yu Y, Johnston RM, Nirmala a, Ngo T, et al. The  
532 neuronal architecture of the mushroom body provides a logic for  
533 associative learning. *Elife*. 2014;1–47.
- 534 45. Tauxe GM, Macwilliam D, Boyle SM, Guda T, Ray A. Targeting a dual  
535 detector of skin and CO<sub>2</sub> to modify mosquito host seeking. *Cell* [Internet].  
536 Elsevier; 2013;155(6):1365–79. Available from:  
537 <http://dx.doi.org/10.1016/j.cell.2013.11.013>
- 538 46. MacWilliam D, Kowalewski J, Kumar A, Pontrello C, Ray A. Signaling  
539 Mode of the Broad-Spectrum Conserved CO<sub>2</sub>Receptor Is One of the  
540 Important Determinants of Odor Valence in *Drosophila*. *Neuron* [Internet].  
541 Elsevier Inc.; 2018;97(5):1153–1167.e4. Available from:  
542 <https://doi.org/10.1016/j.neuron.2018.01.028>
- 543 47. Lee T, Luo L. Mosaic analysis with a repressible cell marker for studies of  
544 gene function in neuronal morphogenesis. *Neuron* [Internet].  
545 1999;22(3):451–61. Available from:  
546 <http://www.ncbi.nlm.nih.gov/pubmed/10197526>
- 547 48. Pfeiffer BD, Ngo T-TB, Hibbard KL, Murphy C, Jenett A, Truman JW, et al.  
548 Refinement of Tools for Targeted Gene Expression in *Drosophila*. *Genetics*  
549 [Internet]. 2010 Aug [cited 2010 Sep 6];16. Available from:  
550 <http://www.ncbi.nlm.nih.gov/pubmed/20697123>
- 551 49. Feng K, Palfreyman MT, Häsemeyer M, Talsma A, Dickson BJ, Feng K, et  
552 al. Ascending SAG Neurons Control Sexual Receptivity of *Drosophila*  
553 Females. *Neuron* [Internet]. 2014 Jul 2 [cited 2014 Jul 10];83(1):135–48.  
554 Available from: <http://www.ncbi.nlm.nih.gov/pubmed/24991958>
- 555 50. Fosque BF, Sun Y, Dana H, Yang C, Ohyama T, Tadross MR, et al.

- 556 Labeling of active neural circuits in vivo with designed calcium integrators.  
557 2015;347(6223).
- 558 51. Nern A, Pfeiffer BD, Rubin GM. Optimized tools for multicolor stochastic  
559 labeling reveal diverse stereotyped cell arrangements in the fly visual  
560 system. Proc Natl Acad Sci [Internet]. 2015;112(22):E2967–76. Available  
561 from: <http://www.pnas.org/lookup/doi/10.1073/pnas.1506763112>
- 562 52. Lai S-L, Lee T. Genetic mosaic with dual binary transcriptional systems in  
563 Drosophila. Nat Neurosci [Internet]. 2006 May;9(5):703–9. Available from:  
564 <http://www.ncbi.nlm.nih.gov/pubmed/16582903>
- 565 53. Tully T, Quinn WG. Classical conditioning and retention in normal and  
566 mutant Drosophila melanogaster. J Comp Physiol A [Internet].  
567 1985;157(2):263–77. Available from:  
568 <https://www.scopus.com/inward/record.uri?eid=2-s2.0-0022119763&partnerID=40&md5=ce08627d42785c31cec54558786f6954>
- 569 54. Chiappe ME, Jayaraman V. Genetically Encoded Functional Indicators  
570 [Internet]. Martin J-R, editor. Totowa, NJ: Humana Press; 2012 [cited 2014  
571 Mar 26]. 83-101 p. (Neuromethods; vol. 72). Available from:  
572 <http://link.springer.com/10.1007/978-1-62703-014-4>  
573

574

## 575 MATERIALS AND METHODS

576

### 577 Contact for Reagent and Resource Sharing

578 Further information and requests for resources and reagents should be directed  
579 to and will be fulfilled by the lead contact Maria Luísa Vasconcelos  
580 ([maria.vasconcelos@neuro.fchampalimaud.org](mailto:maria.vasconcelos@neuro.fchampalimaud.org)).

581

### 582 Experimental Model and Subject Details

583 Flies were maintained on standard cornmeal-agar medium at 18°C or 25°C and  
584 70% relative humidity under a 12h light/dark cycle. Fly strains used were as  
585 follows: *UAS-Kir2.1* (26); *tub-GAL80<sup>TS</sup>* (27); *UAS-Chrimson* (35); *UAS-*  
586 *GCaMP6.0m* (33); *UAS-Dscam17.1-GFP* (31); *UAS-syt-HA* (32); *UAS-CD4-*

587 *GFP<sub>1-10</sub>* (34); *UAS-CD8-GFP* (47); *UAS-VGlutDBD* (30); *UAS-myr-tdTomato*(48);  
588 *LexAop-Kir2.1* (provided by Barry Dickson) (49); *LexAop-Chrimson* (50); *LexAop-*  
589 *GCaMP6.0m* (33); *LexAop-syt-HA* (51); *LexAop-CD4-GFP<sub>11</sub>* (34); *LexAop-*  
590 *mCD2-GFP*(52). We used the following *GAL4* lines: *R21G11*; *R23C09*; *R84A06*;  
591 *R65D12*; *R19B07*; *R13A11*; *R30A10*; *R37G11*; *R33E01*; *R93D02*; *R93D05*;  
592 *R41F11*; *R85C07*; *R64B02*; *R36E10*; *R30H02*; *R25B07*; *R36G09*; *R23F06*;  
593 *R54G12*; *R16C09*; *R13A07*; *R22B02*; *R29F04*; *R16C06*; *R82E01*; *R25A01*;  
594 *R84G12*; *R25G10*; *R26C12*; *R20C09*; *R20B0* from the *Janelia* farm collection  
595 (24,25).

596

## 597 **Genotypes per Figure**

598

### 599 **Figure 1**

#### 600 Panel A

601 *w<sup>1118</sup>;UAS-Kir2.1,tub-Gal80<sup>TS</sup>;+*

602 *w<sup>1118</sup>;UAS-Kir2.1,tub-Gal80<sup>TS</sup>;21G11-GAL4*

603 *w<sup>1118</sup>;UAS-Kir2.1,tub-Gal80<sup>TS</sup>;23C09-GAL4*

604

#### 605 Panel B

606 *w<sup>1118</sup>;LexAop-Kir2.1;+*

607 *w<sup>1118</sup>; ;LexAop-Kir2.1;21G11-LexA*

608

#### 609 Panel C

610 *w<sup>1118</sup>;UAS-Kir2.1,tub-Gal80<sup>TS</sup>;+*

611 *w<sup>1118</sup>;UAS-Kir2.1,tub-Gal80<sup>TS</sup>;23C09-AD/UAS-VGlut-DBD*

612

#### 613 Panel D

614 *w<sup>1118</sup>;+;21G11-GAL4/UAS-mCD8-GFP*

615 *w<sup>1118</sup>;LexAop-mCD2-GFP/+;21G11-LexA/+*

616

#### 617 Panel E

618 *w<sup>1118</sup>;+;23C09-GAL4/UAS-mCD8-GFP/+*

619 *w<sup>1118</sup>;23C09-AD/UAS-VGlut-DBD;UAS-mCD8-GFP/+*

620

621 Panel F and G

622 *w<sup>1118</sup>;UAS-Dscam-17.1-GFP;21G11-GAL4*

623 *w<sup>1118</sup>;UAS-syt-HA;21G11-GAL4*

624

625 Panel H

626 *w<sup>1118</sup>;21G11-LexA/LexAop-CD2-GFP;UAS-myr-tdTomato/53A05-GAL4*

627 *w<sup>1118</sup>; 21G11-LexA/ LexAop-CD2-GFP;UAS-myr-tdTomato /41C05-GAL4*

628

629 Panel I

630 *w<sup>1118</sup>; 23C09-AD/UAS-VGlut-DBD/+;UAS-mCD8-GFP/53A05-GAL4*

631 *w<sup>1118</sup>; 23C09-AD/UAS-VGlut-DBD/+;UAS-mCD8-GFP/41C05-GAL4*

632

633

634 **Figure 2**

635 Panel A and B

636 *w<sup>1118</sup>;21G11-GAL4;UAS-GCaMP6.0m*

637

638 Panel C and D

639 *w<sup>1118</sup>;21G11-LexA;21G11-LexA/LexAop-GCaMP6.0m*

640

641 Panel E and F

642 *w<sup>1118</sup>;23C09-AD/UAS-VGlut-DBD;UASGCaMP6.0m*

643

644

645 **Figure 3**

646 Panel A

647 *w<sup>1118</sup>;LexAop-CD4-GFP<sub>11</sub>/21G11-LexA;UAS-mCD4-GFP<sub>1-10</sub>/23C09-GAL4*

648

649 Panel B, C and D

650 *w<sup>1118</sup>;21G11-LexA, LexAop-Kir2.1/23C09-AD, UAS-VGlut-DBD;21G11-LexA/UAS-*  
651 *GCaMP6.0m*

652

653 Panel E and F

654 *w<sup>1118</sup>;21G11-LexA, LexAop-Chrimson/23C09-AD, UAS-VGlut-DBD;21G11-*  
655 *LexA/UASGCaMP6.0m*

656

657 Panel G and H

658 *w<sup>1118</sup>;21G11-LexA/23C09-AD, UAS-VGlut-DBD;21G11-LexA, LexAop-*  
659 *GCaMP6.0m/UAS-Kir2.1*

660

661 Panel I

662 *w<sup>1118</sup>;21G11-LexA/23C09-AD, UAS-VGlut-DBD;21G11-LexA, LexAop-*  
663 *GCaMP6.0m/UAS-Chrimson*

664

665

666 **Figure 4**

667 Panel A and B

668 *w<sup>1118</sup>;21G11-LexA;21G11-LexA/LexAop-GCaMP6.0m*

669

670 Panel C and D

671 *w<sup>1118</sup>;23C09-AD/UAS-VGlut-DBD;UASGCaMP6.0m*

672

673 Panel E and F

674 *w<sup>1118</sup>;UAS-Kir2.1,tub-Gal80<sup>TS</sup>;+*

675 *w<sup>1118</sup>;UAS-Kir2.1,tub-Gal80<sup>TS</sup>;21G11-GAL4*

676 *w<sup>1118</sup>;UAS-Kir2.1,tub-Gal80<sup>TS</sup>;23C09-GAL4*

677

678 **Figure Supp 1**

679 Panel A

680 *w<sup>1118</sup>;UAS-Kir2.1,tub-Gal80<sup>TS</sup>;84A06-GAL4*  
681 *w<sup>1118</sup>;UAS-Kir2.1,tub-Gal80<sup>TS</sup>;65D12-GAL4*  
682 *w<sup>1118</sup>;UAS-Kir2.1,tub-Gal80<sup>TS</sup>;21G11-GAL4*  
683 *w<sup>1118</sup>;UAS-Kir2.1,tub-Gal80<sup>TS</sup>;23C09-GAL4*  
684 *w<sup>1118</sup>;UAS-Kir2.1,tub-Gal80<sup>TS</sup>;19B07-GAL4*  
685 *w<sup>1118</sup>;UAS-Kir2.1,tub-Gal80<sup>TS</sup>;13A11-GAL4*  
686 *w<sup>1118</sup>;UAS-Kir2.1,tub-Gal80<sup>TS</sup>;30A10-GAL4*  
687 *w<sup>1118</sup>;UAS-Kir2.1,tub-Gal80<sup>TS</sup>;37G11-GAL4*  
688 *w<sup>1118</sup>;UAS-Kir2.1,tub-Gal80<sup>TS</sup>;33E01-GAL4*  
689 *w<sup>1118</sup>;UAS-Kir2.1,tub-Gal80<sup>TS</sup>;93D02-GAL4*  
690 *w<sup>1118</sup>;UAS-Kir2.1,tub-Gal80<sup>TS</sup>;93D05-GAL4*  
691 *w<sup>1118</sup>;UAS-Kir2.1,tub-Gal80<sup>TS</sup>;41F11-GAL4*  
692 *w<sup>1118</sup>;UAS-Kir2.1,tub-Gal80<sup>TS</sup>;85C07-GAL4*  
693 *w<sup>1118</sup>;UAS-Kir2.1,tub-Gal80<sup>TS</sup>;64B02-GAL4*  
694 *w<sup>1118</sup>;UAS-Kir2.1,tub-Gal80<sup>TS</sup>;36E10-GAL4*  
695 *w<sup>1118</sup>;UAS-Kir2.1,tub-Gal80<sup>TS</sup>;30H02-GAL4*  
696 *w<sup>1118</sup>;UAS-Kir2.1,tub-Gal80<sup>TS</sup>;25B07-GAL4*  
697 *w<sup>1118</sup>;UAS-Kir2.1,tub-Gal80<sup>TS</sup>;36G09-GAL4*  
698 *w<sup>1118</sup>;UAS-Kir2.1,tub-Gal80<sup>TS</sup>;23F06 GAL4*  
699 *w<sup>1118</sup>;UAS-Kir2.1,tub-Gal80<sup>TS</sup>;54G12-GAL4*  
700 *w<sup>1118</sup>;UAS-Kir2.1,tub-Gal80<sup>TS</sup>;16C09-GAL4*  
701 *w<sup>1118</sup>;UAS-Kir2.1,tub-Gal80<sup>TS</sup>;13A07-GAL4*  
702 *w<sup>1118</sup>;UAS-Kir2.1,tub-Gal80<sup>TS</sup>;22B02-GAL4*  
703 *w<sup>1118</sup>;UAS-Kir2.1,tub-Gal80<sup>TS</sup>;29F04-GAL4*  
704 *w<sup>1118</sup>;UAS-Kir2.1,tub-Gal80<sup>TS</sup>;16C06-GAL4*  
705 *w<sup>1118</sup>;UAS-Kir2.1,tub-Gal80<sup>TS</sup>;82E01-GAL4*  
706 *w<sup>1118</sup>;UAS-Kir2.1,tub-Gal80<sup>TS</sup>;25A01-GAL4*  
707 *w<sup>1118</sup>;UAS-Kir2.1,tub-Gal80<sup>TS</sup>;84G12-GAL4*  
708 *w<sup>1118</sup>;UAS-Kir2.1,tub-Gal80<sup>TS</sup>;25G10-GAL4*  
709 *w<sup>1118</sup>;UAS-Kir2.1,tub-Gal80<sup>TS</sup>;26C12-GAL4*  
710 *w<sup>1118</sup>;UAS-Kir2.1,tub-Gal80<sup>TS</sup>;20C09-GAL4*

711 *w<sup>1118</sup>;UAS-Kir2.1,tub-Gal80<sup>TS</sup>;20B07-GAL4*

712

713 Panel B

714 *w<sup>1118</sup>;UAS-Kir2.1,tub-Gal80<sup>TS</sup>;65D12-GAL4*

715 *w<sup>1118</sup>;UAS-Kir2.1,tub-Gal80<sup>TS</sup>;21G11-GAL4*

716 *w<sup>1118</sup>;UAS-Kir2.1,tub-Gal80<sup>TS</sup>;23C09-GAL4*

717 *w<sup>1118</sup>;UAS-Kir2.1,tub-Gal80<sup>TS</sup>;13A11-GAL4*

718 *w<sup>1118</sup>;UAS-Kir2.1,tub-Gal80<sup>TS</sup>;33E01-GAL4*

719 *w<sup>1118</sup>;UAS-Kir2.1,tub-Gal80<sup>TS</sup>;85C07-GAL4*

720 *w<sup>1118</sup>;UAS-Kir2.1,tub-Gal80<sup>TS</sup>;36G09-GAL4*

721 *w<sup>1118</sup>;UAS-Kir2.1,tub-Gal80<sup>TS</sup>;16C09-GAL4*

722

723 **Figure Supp 2**

724 Panel A and B

725 *w<sup>1118</sup>;UAS-Kir2.1,tub-Gal80<sup>TS</sup>;+*

726 *w<sup>1118</sup>;UAS-Kir2.1,tub-Gal80<sup>TS</sup>;21G11-GAL4*

727 *w<sup>1118</sup>;UAS-Kir2.1,tub-Gal80<sup>TS</sup>;23C09-GAL4*

728

729 **Figure Supp 3**

730

731 *w<sup>1118</sup>;LexAop-mCD2-GFP/+;21G11-LexA/+*

732 *w<sup>1118</sup>;23C09-AD/UAS-VGlut-DBD;UAS-mCD8-GFP/+*

733

734

735 **Figure Supp 4**

736 *w<sup>1118</sup>;UAS-myR-TdTomato/LexAop-mCD2-GFP;21G11-LexA/21G11-GAL4*

737

738 **Figure Supp 5**

739 *w<sup>1118</sup>;UAS-syt-HA;21G11-LexA*

740

741 **Figure Supp 6**



742

743 Panel A and B

744 *w<sup>1118</sup>;21G11-LexA, LexAop-Kir2.1/21G11-LexA/UAS-GCaMP6.0m*

745

746 Panel C and D

747 *w<sup>1118</sup>;23C09-AD/UAS-VGlut-DBD;UASGCaMP6.0m/UAS-Kir2.1*

748

749

750 **Figure Supp 7**

751

752 Panel A and B

753 *w<sup>1118</sup>;21G11-LexA, LexAop-Chrimson/21G11-LexA/UAS-GCaMP6.0m*

754

755 Panel C and D

756 *w<sup>1118</sup>;23C09-AD/UAS-VGlut-DBD;UASGCaMP6.0m/UAS-Chrimson*

757

758 **Figure Supp 8**

759

760 Panel A

761 *w<sup>1118</sup>;UAS-Kir2.1,tub-Gal80<sup>TS</sup>;+*

762

763

764 **Method Details**

765 Generating transgenic flies

766 For the establishment of the *21G11LexA* line we used the Gateway System. The  
767 *LexA* vector used was purchased from Addgene (Plasmid #26230). We carried  
768 out a genomic PCR with the primers (5' to 3') F-  
769 GGGGACAAGTTTGTACAAAAAAGCAGGCTTCGCGCAGCACGTGAAGAACAA  
770 GGC and R-  
771 GGGGACCACTTTGTACAAGAAAGCTGGGTCATGGCAACGTACTTCCAGTCC  
772 TCT. The fragment was inserted in a pDONR221 vector and then recombined

773 into the pBPnlsLexA::p65Uw vector (Addgene, Plasmid #26230). To construct  
774 the *23C09AD* line we use the fragment in a pDON that was kindly provided by  
775 the Rubin Lab. We recombined it as described above.

776

#### 777 Immunostaining

778 Adult fly brains were dissected, fixed and stained using standard protocols.  
779 Briefly, tissue was dissected in phosphate-buffered saline (PBS), fixed in 4%  
780 PFA in PBL (PBS and 0.12M Lysine) for 30 min at room temperature, washed 3x  
781 for 5 min in PBT (PBS and 0.5% Triton X-100) and blocked for 15 minutes in  
782 10% normal goat serum in PBT (Sigma, cat# G9023). Samples were then  
783 incubated with primary antibodies for 72h at 4°C. After they were washed 3x for 5  
784 min in PBT and incubated with secondary antibodies for 72h at 4°C. Finally the  
785 samples were washed 3x for 5 min in PBT and mounted in Vectashield (Vector  
786 laboratories, cat# H-1000). As primary antibodies we used: rabbit anti-GFP  
787 (1:2000, Molecular Probes, cat# 11122), chicken anti-GFP (1:2000, Molecular  
788 Probes, cat# A10262), rabbit anti-DsRed (1:2000, Molecular Probes, cat#  
789 710530) and mouse anti-nc82 (1:10, Developmental Studies Hybridoma Bank).  
790 The secondary antibodies used were anti-rabbit or anti-chicken IgG conjugated  
791 to Alexa 488, anti-mouse or anti-rabbit IgG conjugated to Alexa 594 and anti-  
792 mouse IgG conjugated to Alexa 405. All microscopy of immunostainings was  
793 performed with a Zeiss LSM 710 confocal microscope. Images were processed  
794 with ImageJ.

795

#### 796 Behavioral experiments

797 *Neuronal silencing* – Flies were kept at 18°C for 8 to 16 days. When using the  
798 *UASKir2.1, TubGAL80<sup>ts</sup>*, tester flies were placed at 30°C 24h before the  
799 experiment while control flies were always kept at 18°C. On the day of the  
800 experiment both tester and control flies were transferred to 25°C where we  
801 quantified their response on a T-maze (53). When using the *LexAopKir2.1* both  
802 tester and control flies were always kept at 25°C. We quantified flies response to  
803 air, three concentrations of CO<sub>2</sub> (0.5%, 1% and 2%), two known attractive (apple

804 cider vinegar (ACV) and farnesol (F)) and two known repulsive compounds  
805 (benzaldehyde (BZ) and acetic acid (AA)). To obtain the CO<sub>2</sub> concentrations we  
806 mixed bottled synthetic air with bottled CO<sub>2</sub> (Linde). The flow rate used was of  
807 0.12 l per min. All other compounds were diluted 1:1000 in paraffin oil (Sigma).  
808 To test for the non-olfactory component to BZ avoidance the olfactory organs  
809 were removed manually (antennae and maxillary palps) 24h before the  
810 experiment. For all experiments flies were tested in groups of 20 individuals.  
811 Flies were placed on the T-maze elevator and dropped to the choice area where  
812 they were given 45 seconds to choose an arm. To control if the T-maze was  
813 balanced, we tested flies to air on both sides. For control and tester flies, one  
814 arm of the T-maze released air while the other arm released the testing  
815 compound. After the experiment, flies were counted and the odor preference  
816 index was calculated by subtracting the number of flies on the air side from the  
817 number of flies on the other side and dividing it with the total number of flies.

818

#### 819 Calcium imaging experiments

820 *Preparation* - For all calcium imaging experiments flies expressed the calcium  
821 indicator *GCaMP6.0m*. The preparation was based on walking behavior  
822 preparation (54) but without the ball. To image the lateral horn (LH) in an *in vivo*  
823 preparation we glued the fly head to a microscope base (Scientifica) with bee's  
824 wax (Sigma). We then opened a window that corresponded to half of the fly brain  
825 and removed all fat and trachea. We made sure that both antennae were  
826 untouched and healthy.

827

828 *Microscopy* - We used an Ultima two-photon laser-scanning microscope from  
829 Prairie Technologies (now Bruker) and a Coherent Chameleon XR lasers. All  
830 images were acquired every 0.2 ms with an Olympus BX61 microscope equipped  
831 with a 40x0.8 NA objective. To measure the fluorescent intensity at the LH we  
832 used ImageJ. The region of interest was delineated by hand and the result time  
833 trace was used for further analysis. To calculate the normalized change in the  
834 relative fluorescence intensity we used the  $\Delta F/F = 100(F_n - F_0)/F_0$  where  $F_n$  is the

835 *nth* frame after stimulation and  $F_0$  is the average basal fluorescence before the  
836 stimulation. Images with visible rhythmic movements of the animal were  
837 discarded.

838

839 *Olfactory stimulation* – For olfactory stimulation a custom made delivery system  
840 consisting of a four-way solenoid valve (Parker Hannifin) connected to a  
841 peristaltic pump (Ismatec) creating a continuous airstream (1800 ml/min) that  
842 was delivered to the antennae with chemically inert tubing (Ismatec). The valve  
843 stimulation was commanded through the PrairieView software. For the CO<sub>2</sub>  
844 stimulation, dilutions were placed in Tedlar gas sampling bags (#24634, Sigma)  
845 that were then connected to the valve. For stimulation with other compounds  
846 dilutions were made in glass vials with rubber taps (Fisher). At the rubber tap we  
847 inserted two venofix needles (Braun): one to connect the vial to the valve, the  
848 other to connect the vial to the air in the room for air-flow in the vial. We setup the  
849 system so that when a stimulus is triggered the odor dilutions replace only 50%  
850 of the air-flow in order to minimize the turbulence. For this reason all dilutions  
851 were prepared to double of the desired concentrations. In all experiments stimuli  
852 were delivered for one second. To control for calcium changes with the air-flow,  
853 all stimulations were repeated twice. In addition we performed experiments both  
854 in and outside the LH, and imaged the LH in neurons with both *Kir2.1* and  
855 *GCaMP6.0m*. No interference from the air-flow in the calcium response was ever  
856 observed.

857

858 *Neuronal activation* – For the neuronal activation we used 8 LEDs of 720 nm  
859 wavelength in a custom made ring placed beneath the stage that surrounded the  
860 fly. The delivery of light to the fly was commanded through the PrairieView  
861 software. The stimulus was delivered for one second at 5 Hz and 40 ms pulses.

862

863 *Neuronal silencing* – For the neuronal silencing experiments all flies expressed  
864 *Kir2.1*.

865

866 **Quantification and Statistical Analysis**

867 All behavioral data was statistically analyzed by one-way analysis of variance  
868 and a Sidak's multiple comparisons test. For all imaging data a Wilcoxon signed-  
869 rank test comparison was performed. For all analysis and statistical tests we  
870 used the GraphPad Prism Software version 6.0 (GraphPad Software).

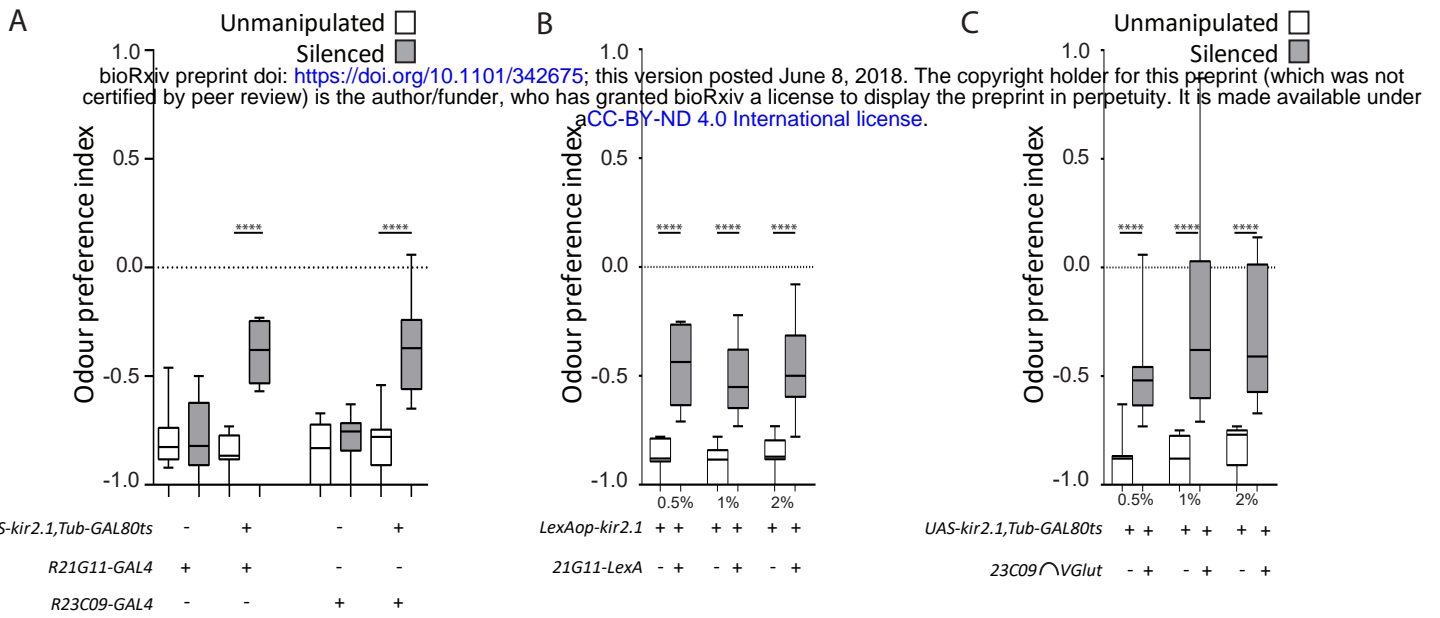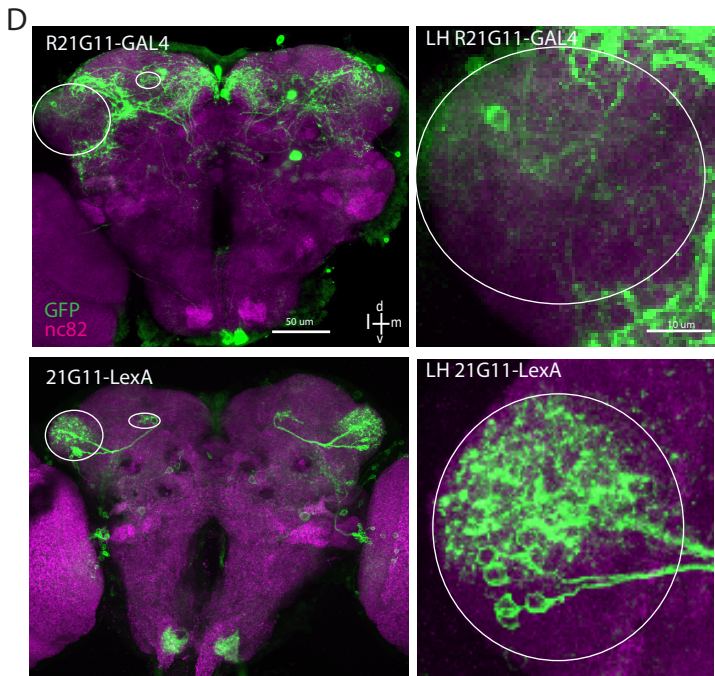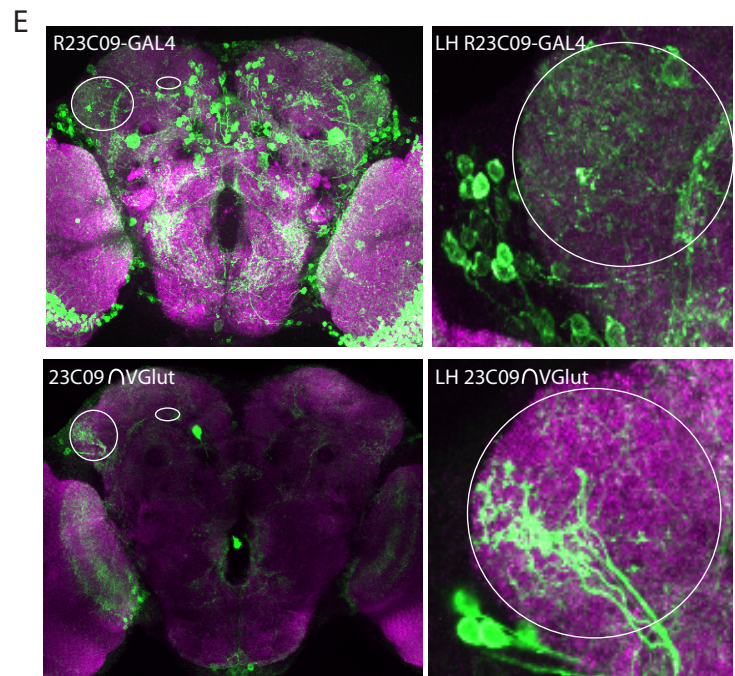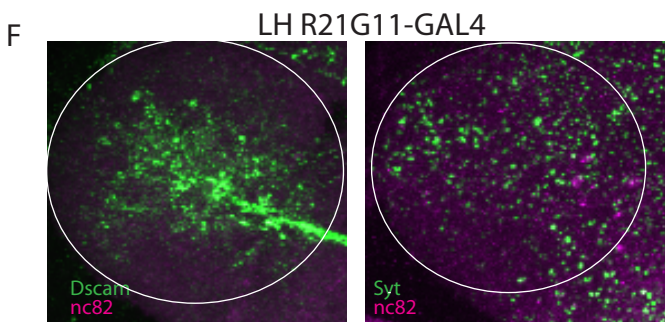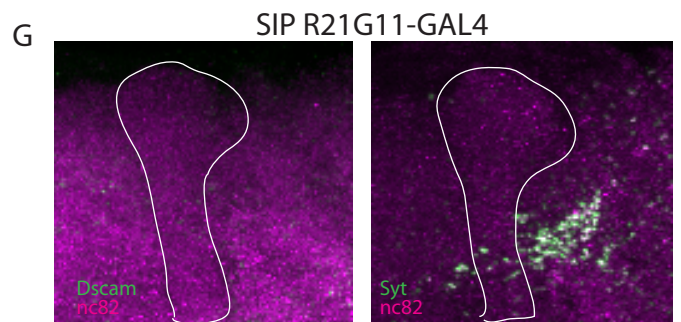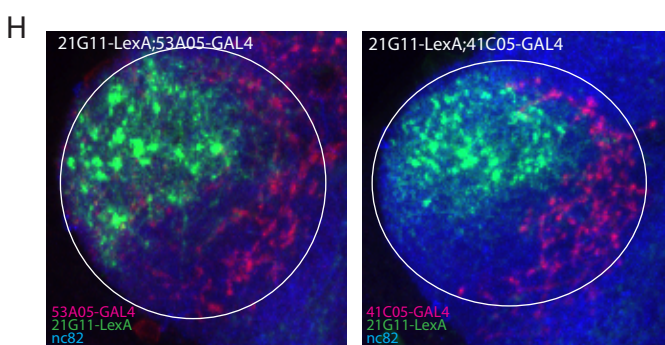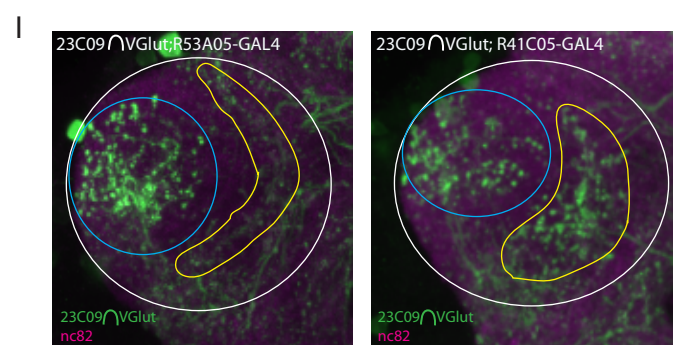

## Figure 1

### Activity in 21G11 and 23C09 neurons is required for behavioral response to CO<sub>2</sub>

bioRxiv preprint doi: <https://doi.org/10.1101/342675>; this version posted June 8, 2018. The copyright holder for this preprint (which was not certified by peer review) is the author/funder, who has granted bioRxiv a license to display the preprint in perpetuity. It is made available under aCC-BY-ND 4.0 International license.

(A) T-maze response to 1% CO<sub>2</sub> of R21G11-GAL4 and R23C09-GAL4 flies driving UAS-Kir, TubGAL80TS expression (A and C) White boxes, no heat induction of Kir2.1 expression (“unmanipulated”, see materials and methods). Grey boxes, heat induction of Kir2.1 expression before test (“silenced”). The box represents the first and the third quartiles and the whiskers the 10th and 90th percentiles. The line across the box is the median.

(B and C) T-maze response to three CO<sub>2</sub> concentrations - 0.5%, 1% and 2% - of the flies with 21G11-LexA driving LexAopKir2.1 expression (B) and 23C09 $\wedge$ VGlut driving UAS-Kir, TubGAL80TS expression (C). For 21G11-LexA driving LexAopkir2.1 expression, white boxes represent parental controls and grey boxes represent constitutive Kir expression. For 23C09 $\wedge$ VGlut driving UAS-Kir, TubGAL80TS expression, white boxes represent no heat induction of Kir expression and grey boxes represent heat induction of Kir expression before test. Post-hoc two-way ANOVA showed no significance when comparing among expressions for both control and test samples.

(D) Brain and lateral horn (LH) UAS-mCD8-GFP expression of R21G11-GAL4 and 21G11-LexA (green).

(E) Brain and LH UAS-mCD8-GFP expression of R23C09-GAL4 and 23C09 $\wedge$ VGlut (green).

(D-E) Circle highlights the LH and oval highlights the superior intermediate protocerebrum (SIP).

(F and G) Dscam 17.1-GFP and syt-HA expression in the LH and SIP of R21G11-GAL4 (green). In (F) circle highlights the LH. In (G) the vertical lobe of the mushroom body is drawn to facilitate visualization of the adjacent SIP.

(H) LH showing expression of 21G11-LexA (green) and the V-projection neuron lines R53A05-GAL4 (red) and R41C05-GAL4 (red). Circle highlights the LH.

(I) LH expression of 23C09 $\wedge$ Vglut (blue circles) and the V-projection neuron lines R53A05-GAL4 (yellow circle) and R41C05-GAL4 (yellow circle). White circle highlights the LH.

For all images the brain neuropil was stained with nc82 (magenta and blue). d=dorsal; l=lateral; m=medial; v=ventral. N=9-10;  $\pm$ SEM \*\*\*\*p<0.0001. All p values are calculated with one-way ANOVA.

A R21G11-GAL4,UAS-GCaMP6.0m

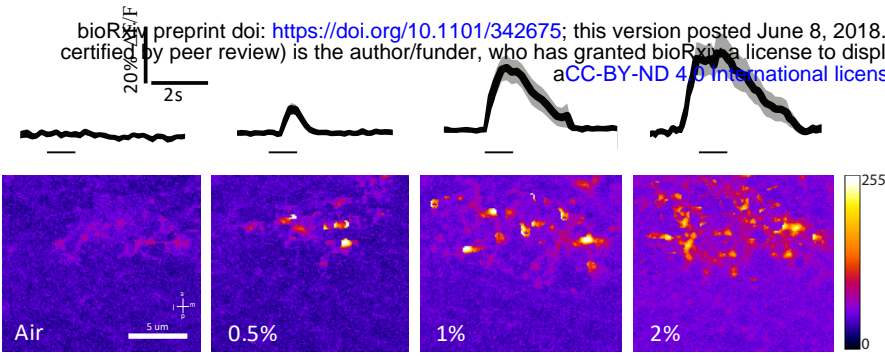

B

N = 11

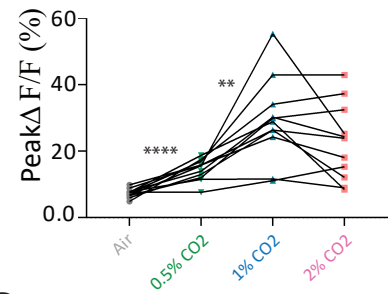

C 21G11-LexA, LexAop-GCaMP6.0m

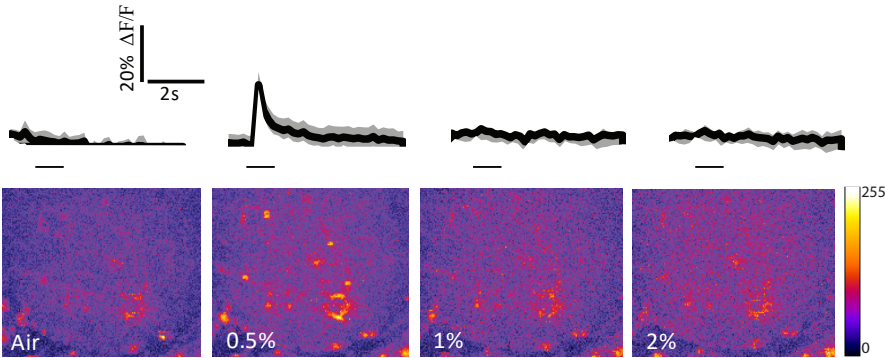

D

N = 5

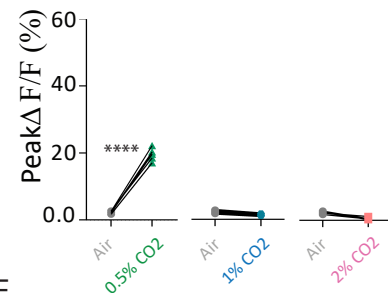

E 23C09 ∩ VGlut, UAS-GCaMP6.0m

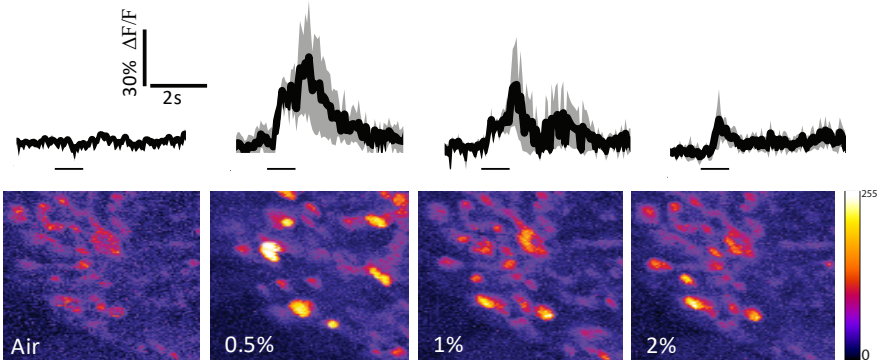

F

N = 12

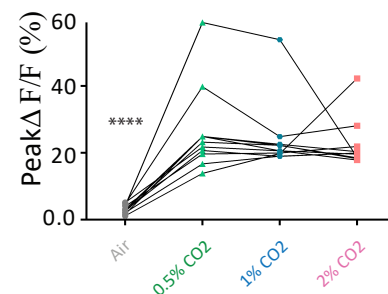

Figure 2

Physiological response to CO<sub>2</sub> of 21G11 and 23C09 neurons

(A,C and E) LH activity of R21G11-GAL4, 21G11-LexA and 23C09 ∩ VGlut, respectively to air, 0.5%, 1% and 2% of CO<sub>2</sub>. On top it is shown the average time course of GCaMP6.0m intensity change. The black bar indicates the time of the stimulus. The black trace represents the average while the grey shows the range of individual traces. On bottom the representative images showing the pseudo-colored response.

(B,D and F) Peak GCaMP6.0m intensity change after stimulation with air, 0.5%, 1% and 2% of CO<sub>2</sub>.

a=anterior; l=lateral; m=medial; p=posterior. Error bars indicate ±SEM, \*\*p<0.01, \*\*\*p<0.001, \*\*\*\*p<0.0001. All p values are calculated with Wilcoxon signed-rank test.



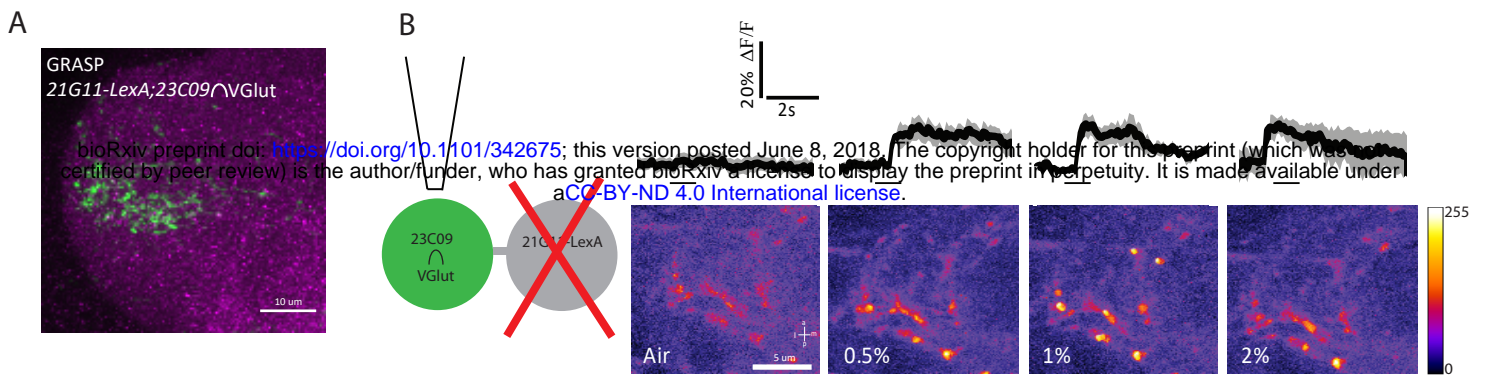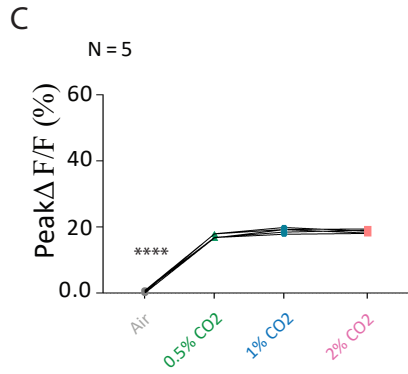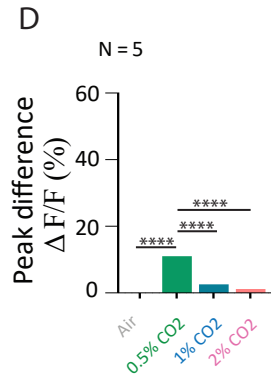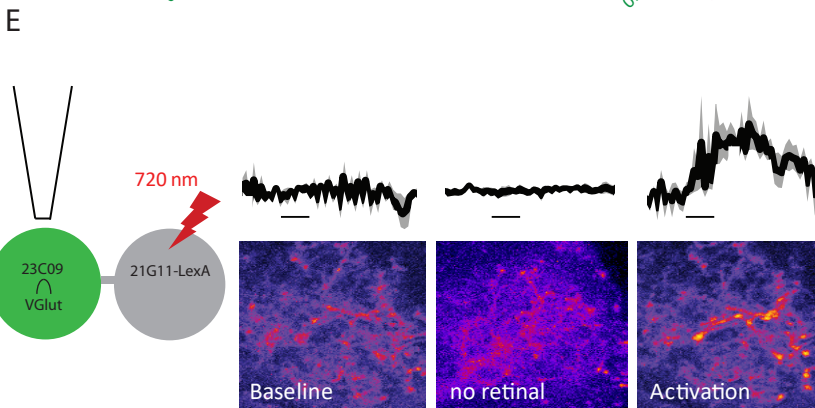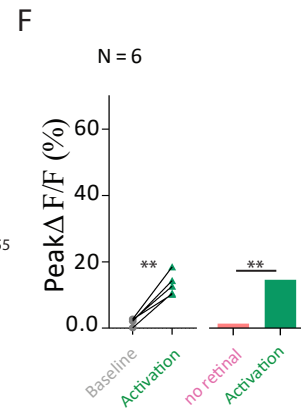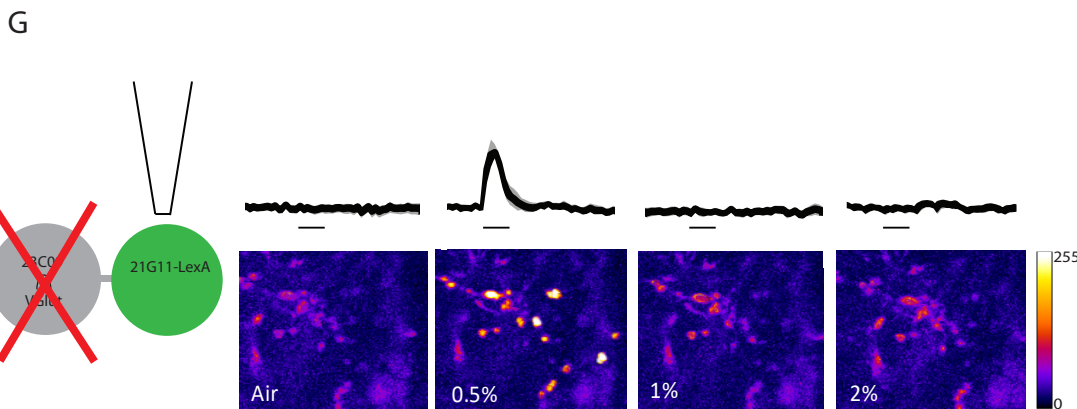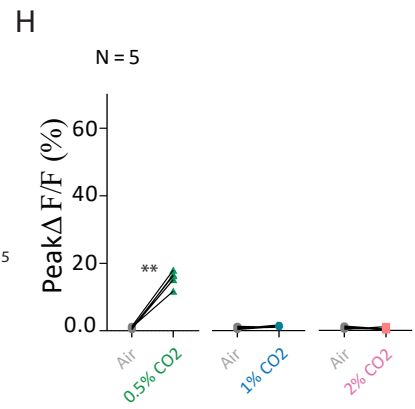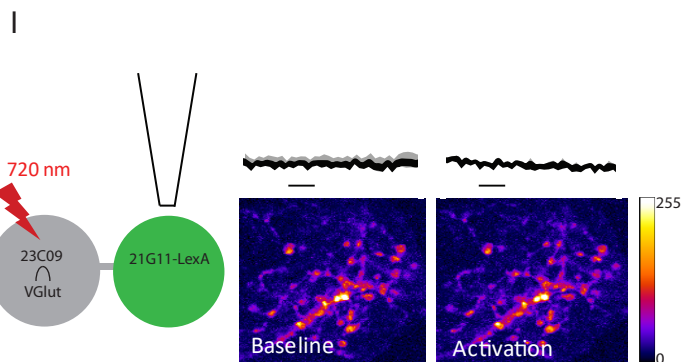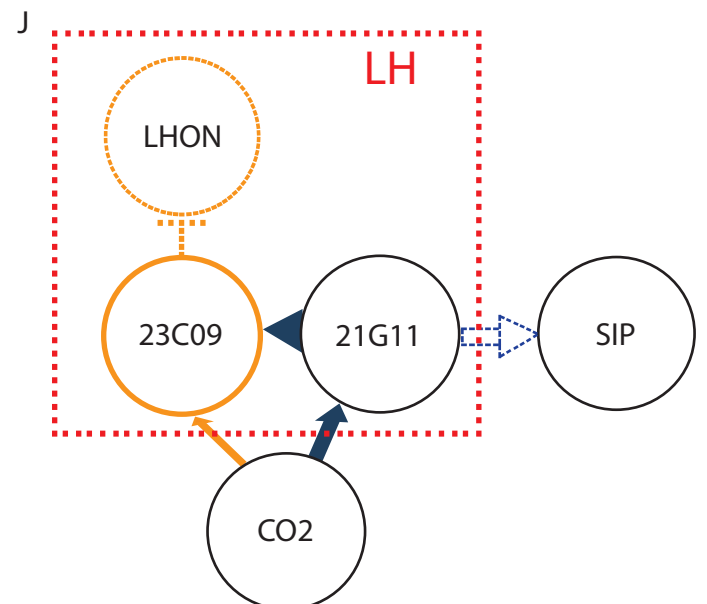

### Figure 3

21G11LexA neurons are pre-synaptic to 23C09 VGlut neurons.

bioRxiv preprint doi: <https://doi.org/10.1101/342675>; this version posted June 8, 2018. The copyright holder for this preprint (which was not certified by peer review) is the author/funder, who has granted bioRxiv a license to display the preprint in perpetuity. It is made available under aCC-BY-ND 4.0 International license.

(A) Schematics of the experiment and calcium response at the LH, using GCaMP6m, of 23C09/VGlut neurons to air, 0.5%, 1% and 2% of CO<sub>2</sub> while 21G11-LexA neurons are silenced by expression of Kir2.1.

(B) Schematics of the experiment and calcium response at the LH, using GCaMP6m, of 23C09/VGlut neurons to air, 0.5%, 1% and 2% of CO<sub>2</sub> while 21G11-LexA neurons are silenced by expression of Kir2.1.

(C and D) Peak GCaMP6.0m intensity change and peak difference in intensity after stimulation with air, 0.5%, 1% and 2% of CO<sub>2</sub>.

(E) Schematics of the experiment and calcium response at the LH of 23C09/VGlut during baseline, activity without retinal and upon activation with 720 nm light of 21G11-LexA driving expression of Chrimson.

(F) Peak GCaMP6.0m intensity change of 23C09/VGlut during baseline, activity without retinal and upon activation with 720 nm light of 21G11-LexA driving expression of Chrimson.

(G) Schematics of the experiment and calcium response at the LH, using GCaMP6m, of 21G11-LexA neurons to air, 0.5%, 1% and 2% of CO<sub>2</sub> while 23C09/VGlut neurons are silenced by expression of Kir2.1.

(H) Peak GCaMP6.0m intensity change after stimulation with air, 0.5%, 1% and 2% of CO<sub>2</sub>.

(I) Schematics of the experiment and LH activity of 21G11-LexA upon activation of 23C09/VGlut neurons, expressing Chrimson, with 720 nm light.

(J) Proposed model of the LH neurons processing CO<sub>2</sub> information.

For (B), (E), (G) and (I), on top it is shown the average time course of GCaMP6.0m intensity change. The black bar indicates the time of the stimulus. On bottom the representative images showing the pseudo-colored response.

a=anterior; l=lateral; m=medial; p=posterior. Error bars indicate  $\pm$ SEM \*\*p<0.01, \*\*\*\*p<0.0001. All p values are calculated with Wilcoxon signed-rank test.

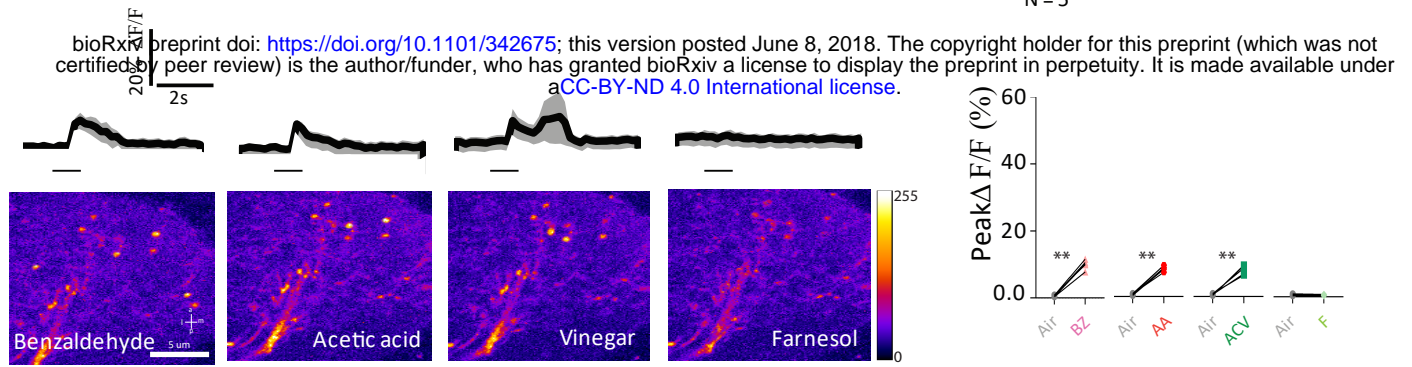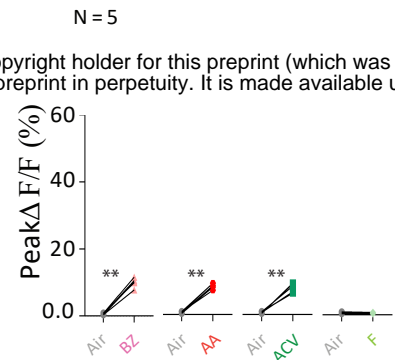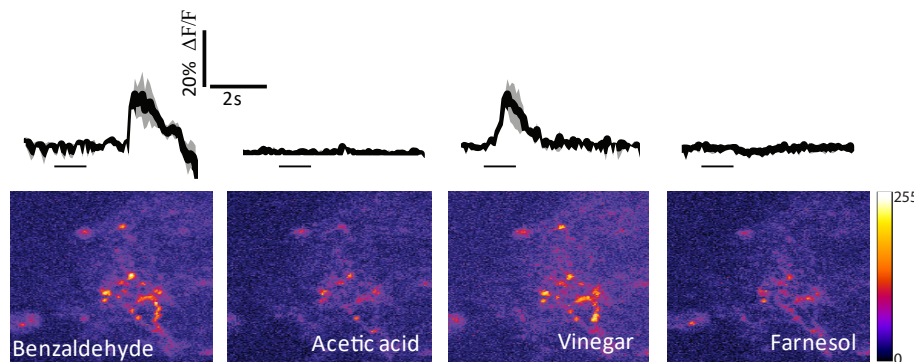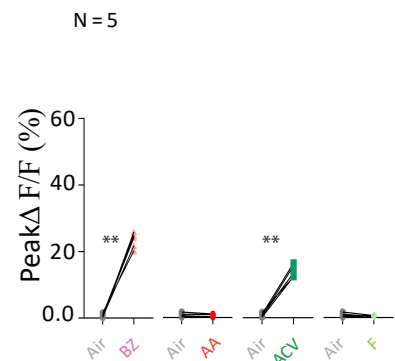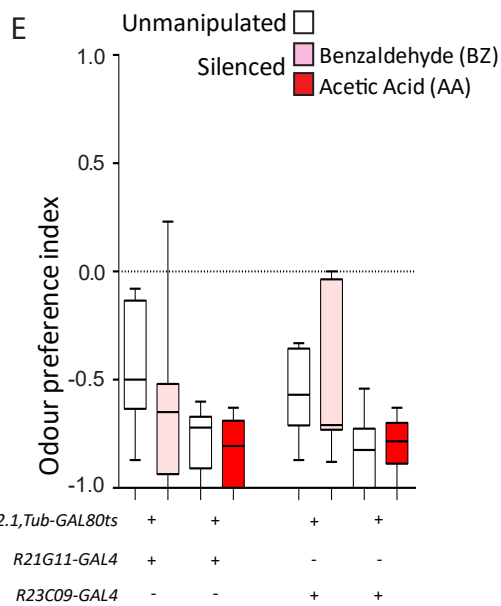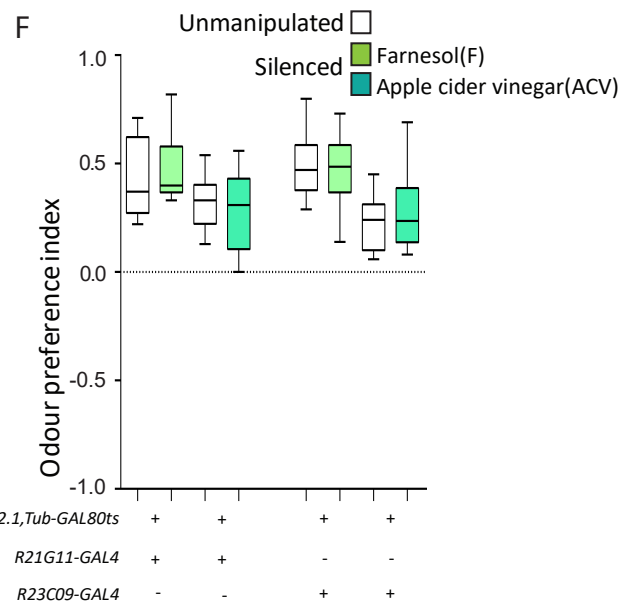

Figure 4  
Physiological and behavioral response to attractive and repulsive compounds of R21G11 and R23C09 neurons

(A and C) Calcium response at the LH of 21G11-LexA and of 23C09  $\cap$  VGlut to the repulsive compounds – benzaldehyde (BZ) and acetic acid (AA)- and the attractive compounds – farnesol (F) and apple cider vinegar (ACV). On top it is shown the average time course of GCaMP6.0m intensity change. The black bar indicates the time of the stimulus. On bottom the representative images showing the pseudo-colored response.

(B and D) Peak GCaMP6.0m intensity change after stimulation with benzaldehyde (BZ), acetic acid (AA), farnesol (F) and apple cider vinegar (ACV).

(E) T-maze response to benzaldehyde (BZ) and acetic acid (AA) of R21G11-GAL4 and R23C09-GAL4.

(F) T-maze response to farnesol (F) and apple cider vinegar (ACV) of 21G11-GAL4 and 23C09-GAL4.

(E-F) White boxes, no heat induction of Kir2.1 expression (“unmanipulated”, see materials and methods). Colored boxes, heat induction of Kir2.1 expression before test (“silenced”). The box represents the first and the third quartiles and the whiskers the 10th and the 90th percentiles. The line across the box is the median.

N=5 for A, B, C and D; N=10 for E and F. For B and D Error bars indicate  $\pm$ SEM \*\* $p$ <0.01, \*\*\*\* $p$ <0.0001.  $p$  values are calculated with Wilcoxon signed-rank test. For E and F comparisons calculated with one-way ANOVA are non-significant.
